# Supplementary material for: Single intravenous administration of oncolytic adenovirus TILT-123 results in systemic tumor transduction and immune response in patients with advanced solid tumors
Source: PubMed Central journal article supplement (PMC11539705; doi:10.1186/s13046-024-03219-0), 2024-11-06
Supplement: 13046_2024_3219_MOESM2_ESM.pdf [file 13046_2024_3219_MOESM2_ESM.pdf]

**Supplementary Table 1**

|                    | TUNIMO             | TUNINTIL | PROTA | Cross-trial |
|--------------------|--------------------|----------|-------|-------------|
| Dose received (VP) | Number of patients |          |       |             |
| $3 \times 10^9$    | 2                  | 3        | N/A   | 5           |
| $3 \times 10^{10}$ | 4                  | 3        | N/A   | 7           |
| $3 \times 10^{11}$ | 3                  | 3        | 3     | 9           |
| $1 \times 10^{12}$ | 3                  | 3        | 3     | 9           |
| $2 \times 10^{12}$ | 3                  | 5        | 3     | 11          |
| $4 \times 10^{12}$ | 5                  | N/A      | 6     | 11          |
