# Supplementary material for: Single intravenous administration of oncolytic adenovirus TILT-123 results in systemic tumor transduction and immune response in patients with advanced solid tumors
Source: PubMed Central journal article supplement (PMC11539705; doi:10.1186/s13046-024-03219-0), 2024-11-06
Supplement: 13046_2024_3219_MOESM3_ESM.pdf [file 13046_2024_3219_MOESM3_ESM.pdf]

**Supplementary Table 2**

| <b>Antibody</b> | <b>Dilution</b> | <b>Catalog</b>       | <b>Manufacturer</b>  |
|-----------------|-----------------|----------------------|----------------------|
| CD45            | 1:100           | M0701                | Dako                 |
| CD4             | 1:400<br>1:500* | ab133616             | Abcam                |
| CD8             | 1:300<br>1:500* | M7103<br>ab101500    | Dako<br>Abcam        |
| CD56            | 1:100           | 156R-94              | CM                   |
| CD20            | 1:200           | MS-340               | Thermo               |
| Foxp3           | 1:100<br>1:300* | ab20034<br>MAB8214   | Abcam<br>R&D Systems |
| PD-1            | 1:150<br>1:200  | LSB12784<br>ab137132 | LSBio<br>Abcam       |
| PD-L1           | 1:200<br>1:150* | 13684                | CST<br>CST           |
| E cadherin      | 1:200           | 3195                 | CST                  |
| Pan cytokeratin | 1:200           | ab9377               | Abcam                |
