# Supplementary material for: Single intravenous administration of oncolytic adenovirus TILT-123 results in systemic tumor transduction and immune response in patients with advanced solid tumors
Source: PubMed Central journal article supplement (PMC11539705; doi:10.1186/s13046-024-03219-0), 2024-11-06
Supplement: 13046_2024_3219_MOESM4_ESM.pdf [file 13046_2024_3219_MOESM4_ESM.pdf]

### Supplementary Table 3

| List of all differentially expressed proteins at 192h post-injection – TUNIMO |                     |                              |         |                     |                              |
|-------------------------------------------------------------------------------|---------------------|------------------------------|---------|---------------------|------------------------------|
| Gene                                                                          | $\log_2(\text{FC})$ | $-\log_{10}(\text{p-value})$ | Gene    | $\log_2(\text{FC})$ | $-\log_{10}(\text{p-value})$ |
| Gal-9                                                                         | 0.029635            | 1.319550283                  | CXCL13  | 0.048801            | 1.904789772                  |
| EGF                                                                           | 0.062898            | 1.384473243                  | MIC-A/B | 0.050129            | 1.989110658                  |
| CXCL9                                                                         | 0.156572            | 1.384473243                  | IL15    | 0.06269             | 1.989110658                  |
| CD83                                                                          | 0.096483            | 1.384473243                  | CXCL10  | 0.132718            | 2.077699372                  |
| IFNG                                                                          | 0.26407             | 1.384473243                  | IL10    | 0.322664            | 2.173027254                  |
| CD5                                                                           | 0.045107            | 1.451741376                  | IL18    | 0.047509            | 2.269937267                  |
| CD8A                                                                          | 0.043327            | 1.52069299                   | CX3CL1  | 0.090219            | 2.269937267                  |
| CCL4                                                                          | 0.072732            | 1.52069299                   | NCR1    | 0.153472            | 2.269937267                  |
| IL6                                                                           | 0.083213            | 1.52069299                   | PDCD1   | 0.062836            | 2.269937267                  |
| TNFRSF9                                                                       | 0.059148            | 1.592205916                  | TNF     | 0.143442            | 2.816479931                  |
| CSF-1                                                                         | 0.014013            | 1.666645234                  | CD70    | 0.098544            | 2.816479931                  |
| CRTAM                                                                         | 0.079346            | 1.743128228                  | IL12RB1 | 0.220898            | 2.935666338                  |
| FASLG                                                                         | 0.07646             | 1.743128228                  | PD-L1   | 0.111131            | 3.214419939                  |
| LAG3                                                                          | 0.118553            | 1.821722986                  | KLRD1   | 0.105133            | 3.369321899                  |
| MCP-2                                                                         | 0.05496             | 1.904789772                  | CD27    | 0.078939            | 3.913389944                  |
