# Supplementary material for: Single intravenous administration of oncolytic adenovirus TILT-123 results in systemic tumor transduction and immune response in patients with advanced solid tumors
Source: PubMed Central journal article supplement (PMC11539705; doi:10.1186/s13046-024-03219-0), 2024-11-06
Supplement: 13046_2024_3219_MOESM5_ESM.pdf [file 13046_2024_3219_MOESM5_ESM.pdf]

**Supplementary Table 4**

| <b>Target mRNA</b>      | <b>Sequence</b>                                                                                                  |
|-------------------------|------------------------------------------------------------------------------------------------------------------|
| Adenovirus 3 fiber knob | AATGCTACTACAAAGCAAGCGATGGTGCCCTTT<br>TTCCGTTGGAAGTTACTGTTATGCTTAATAAACG<br>CCTGCCAGATAGTCGCACATCCTATGTTATGAC     |
| Adenovirus 5 hexon      | ATGCAATTTTTCTCAACTACTGAGGCAGCCG<br>CAGTCAATGGTGATAACTTGACTCCAAAAGT<br>GGTATTGTATAGCGAAGACGTGGATATAGAA<br>ACTCCAG |
| Adenovirus 5 E1A        | CGAGCAGCCGGAGCAGAGAGCCTTGGGTCCG<br>GTTTCTATGCCAAACCTTGTACCGGAGGTGATC<br>GATCTTACCTGCCACGAGGCTGGCTTTCCACCC<br>AGT |
