# Supplementary material for: Single intravenous administration of oncolytic adenovirus TILT-123 results in systemic tumor transduction and immune response in patients with advanced solid tumors
Source: PubMed Central journal article supplement (PMC11539705; doi:10.1186/s13046-024-03219-0), 2024-11-06

# Supplementary Figure 2

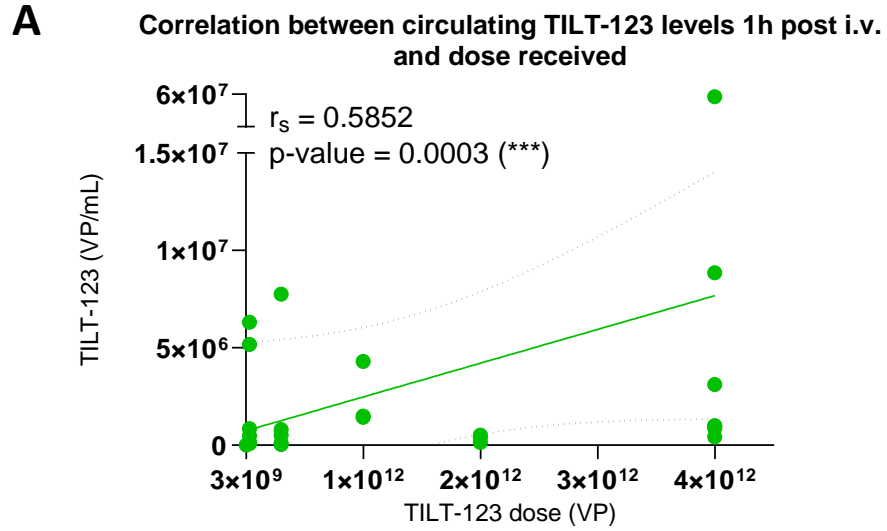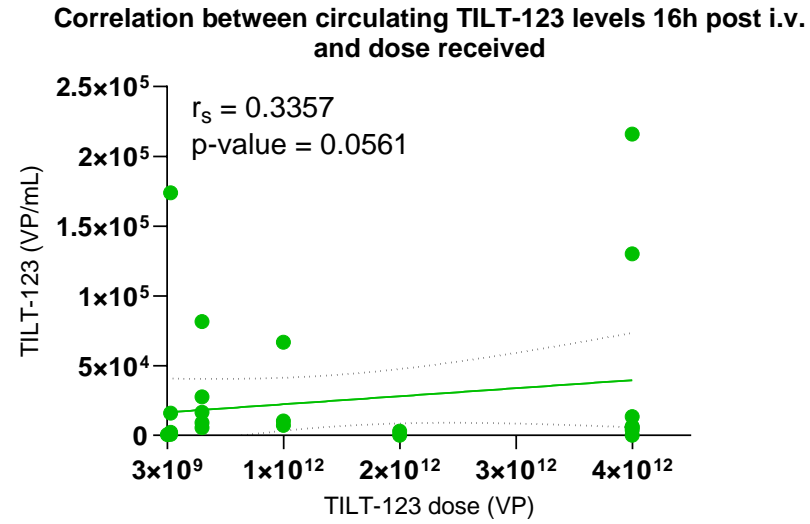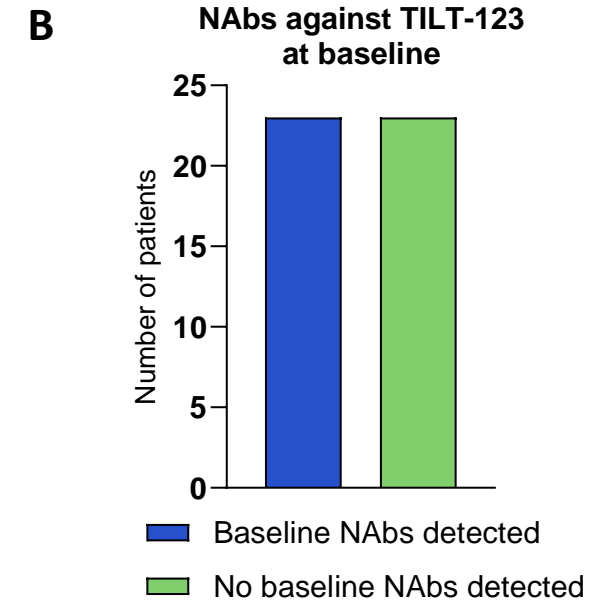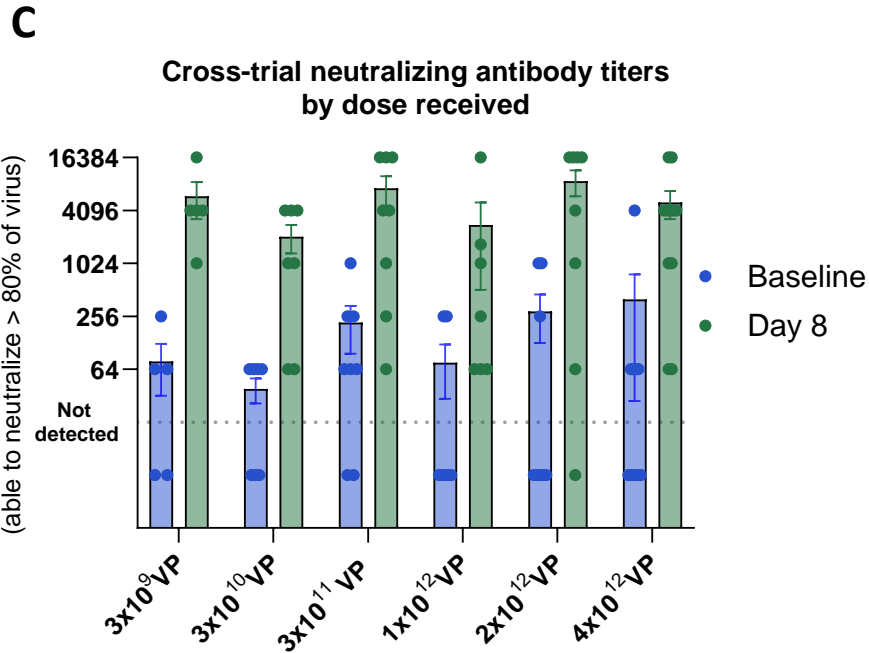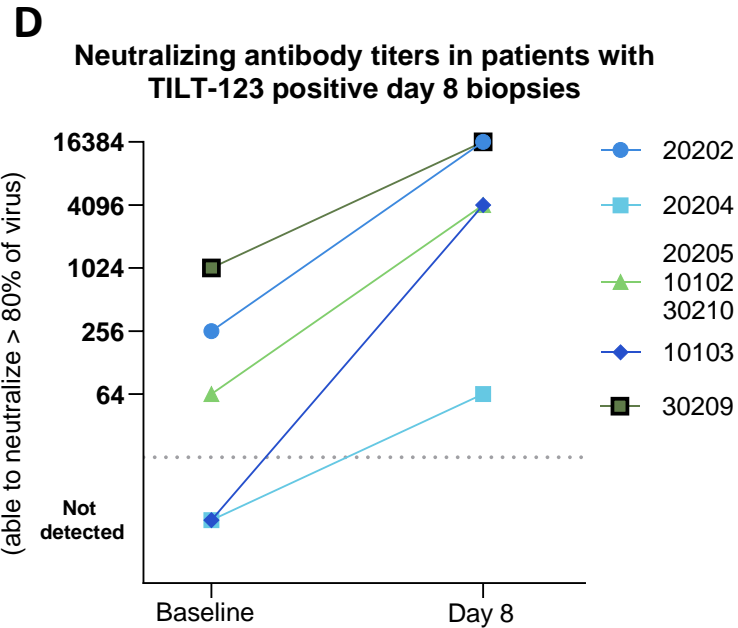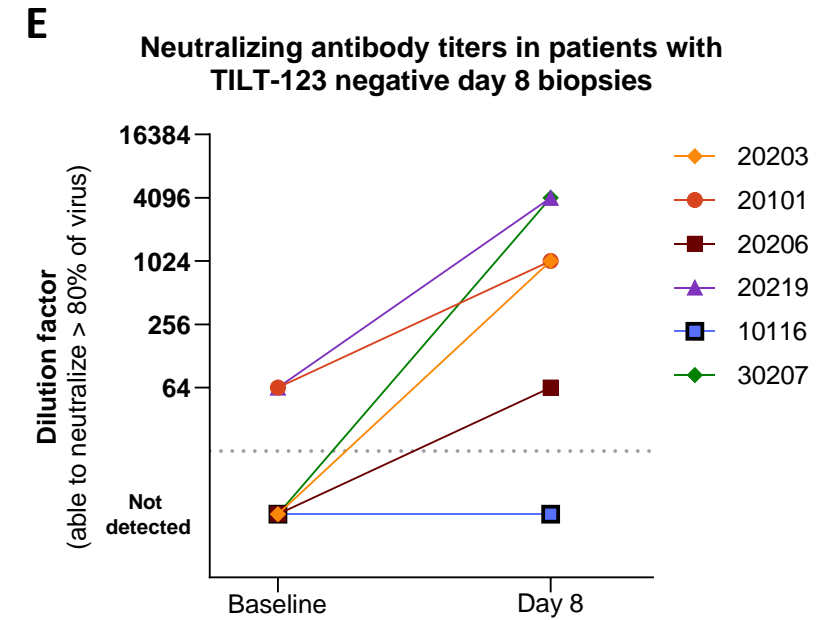

Supplement: 13046_2024_3219_MOESM7_ESM.pdf [file 13046_2024_3219_MOESM7_ESM.pdf]
